# Supplementary material for: Potential Biosorbent Derived from Calligonum polygonoides for Removal of Methylene Blue Dye from Aqueous Solution
Source: Hindawi journal article supplement (doi:10.1155/2015/562693), 2015-01-01
Supplement: f1 [file 562693.f1.pdf]

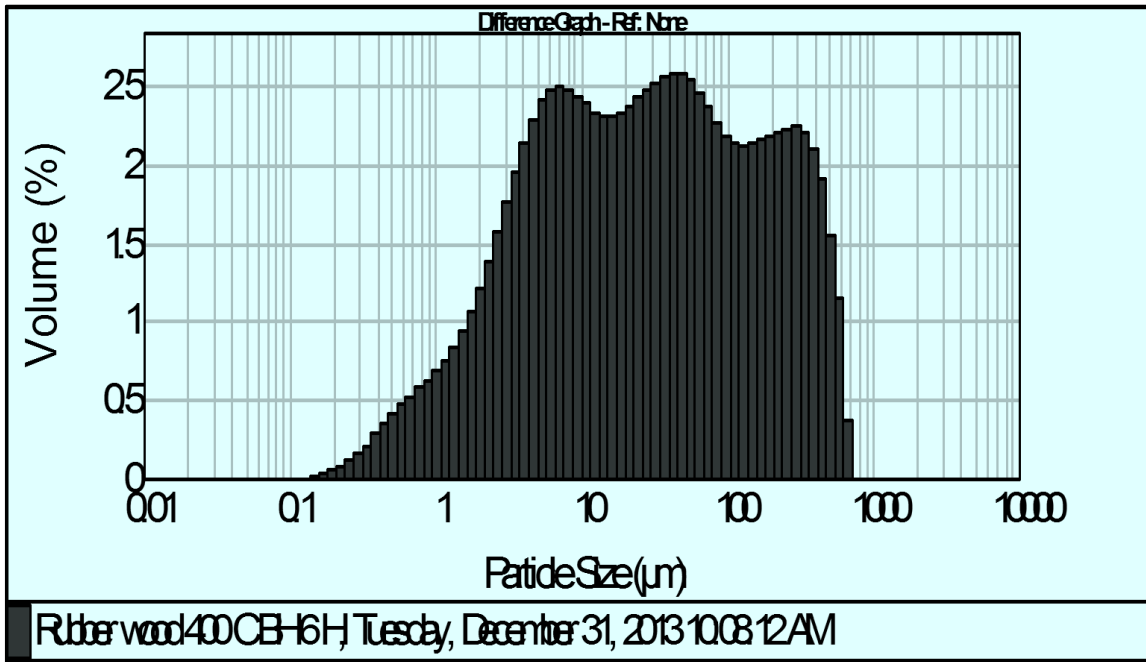

Fig. 1. Particle size of *C. polygonides* ash.

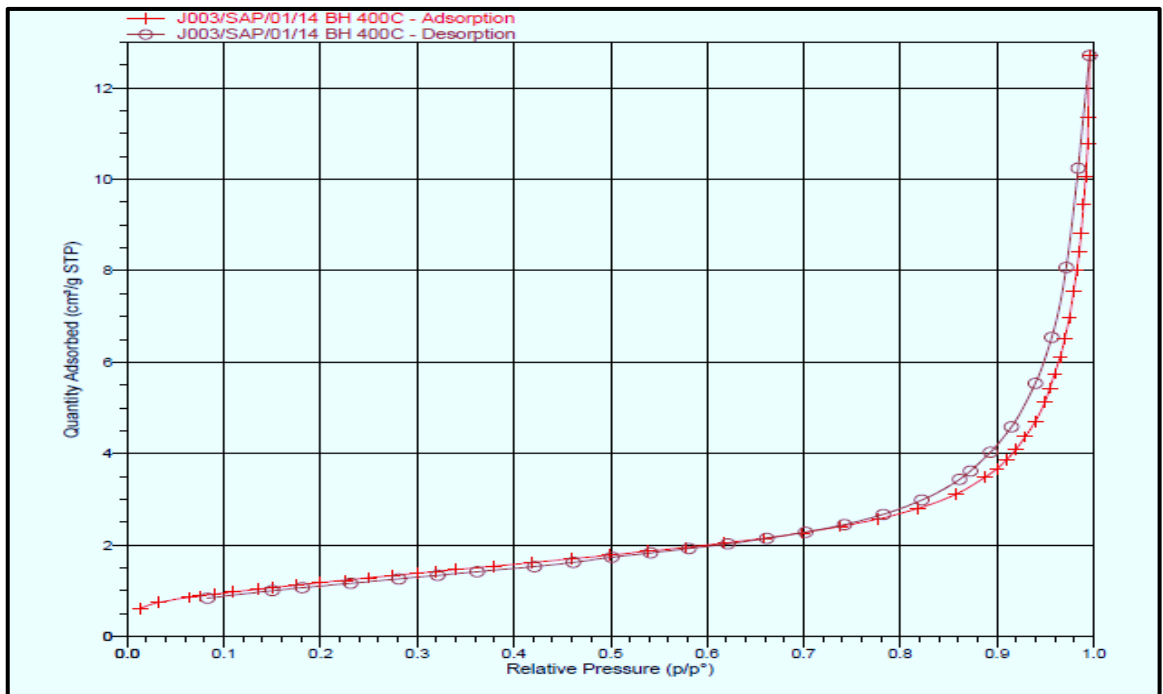

Fig. 2. N<sub>2</sub> adsorption-desorption isotherm of *C. polygonides* ash
